# Supplementary material
Source: PubMed Central journal article supplement (PMC4789140)
Supplement: NIHMS698693-supplement-JNE_12_4_046009_SuppFigures_pdf.pdf [file NIHMS698693-supplement-JNE_12_4_046009_SuppFigures_pdf.pdf]

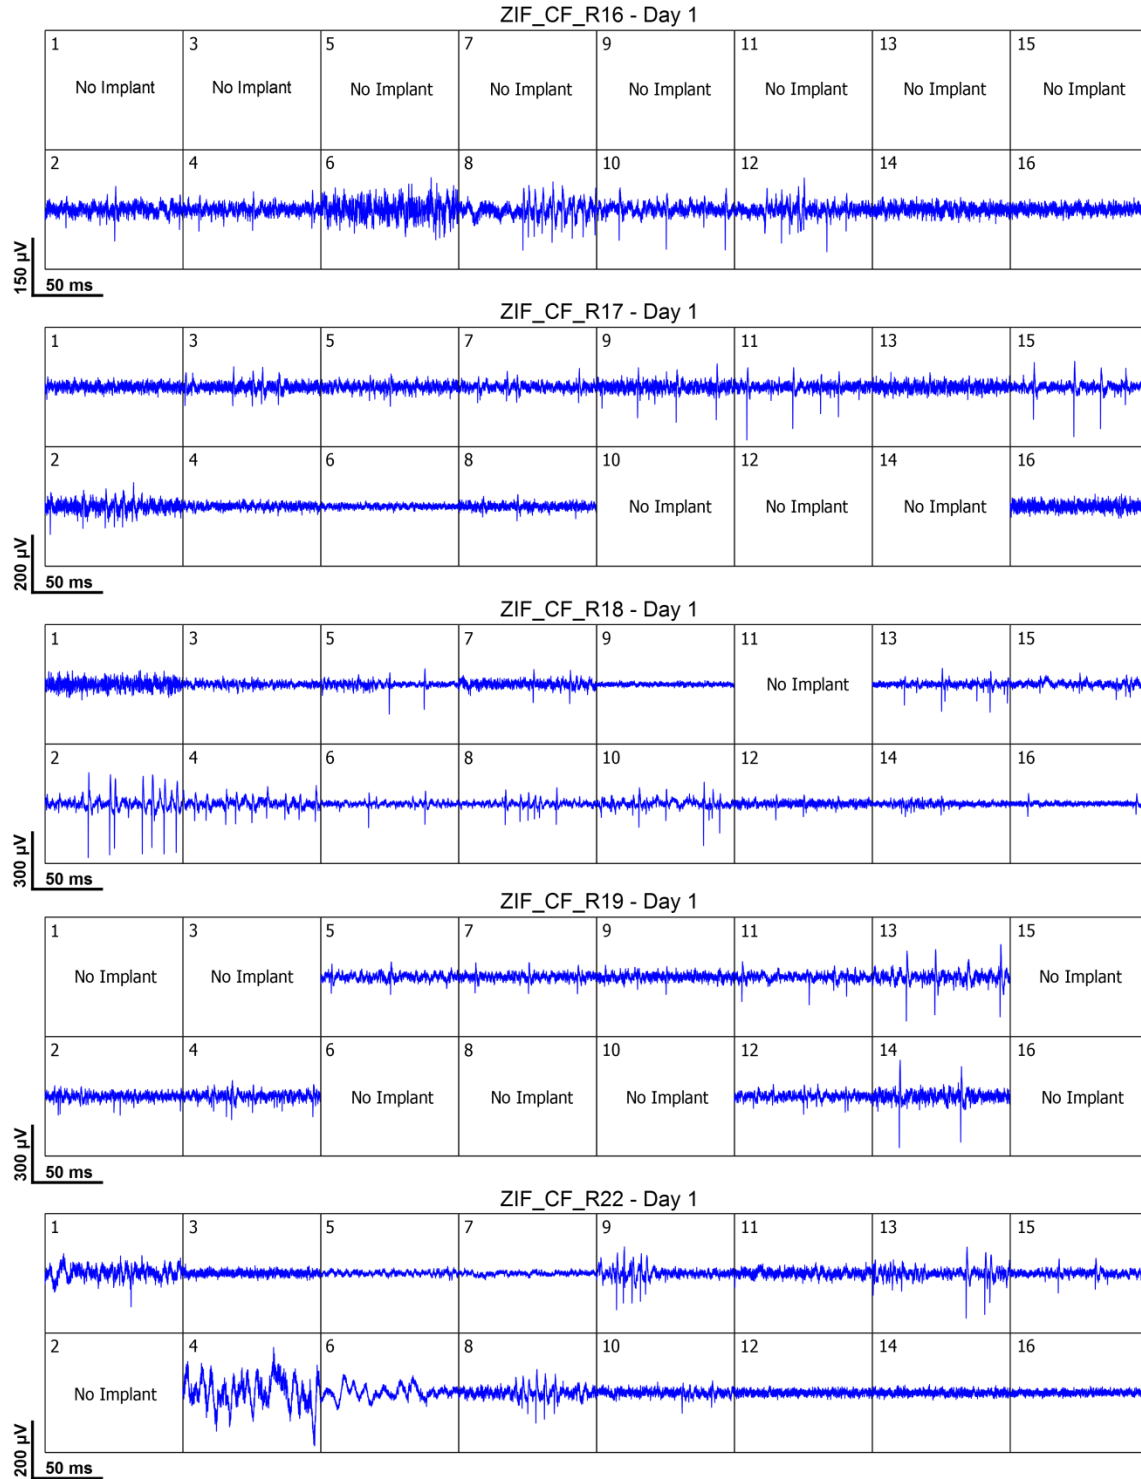

**Figure S1.** Representative filtered (250 Hz corner, 4<sup>th</sup> order Butterworth, high-pass) high speed recordings from each implanted carbon fiber at day 1 post-operatively.

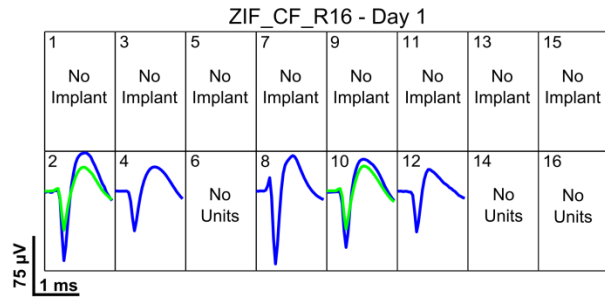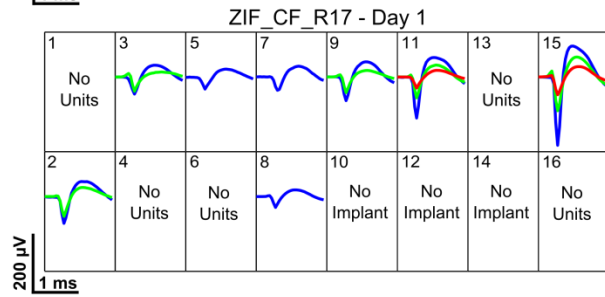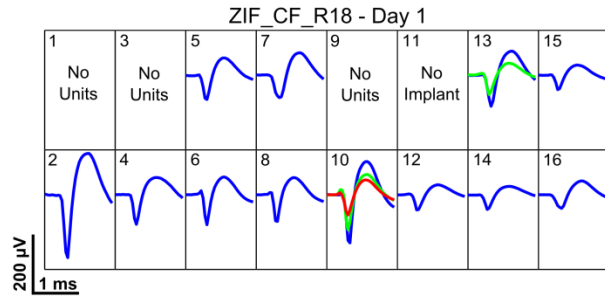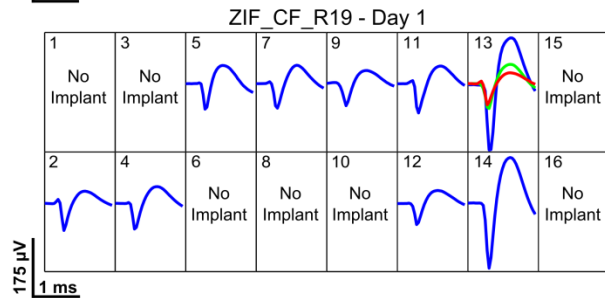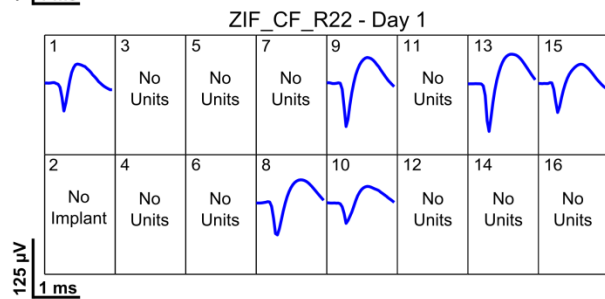

**Figure S2.** Average waveforms of sorted units detected on each implanted site at day 1 post-operatively.

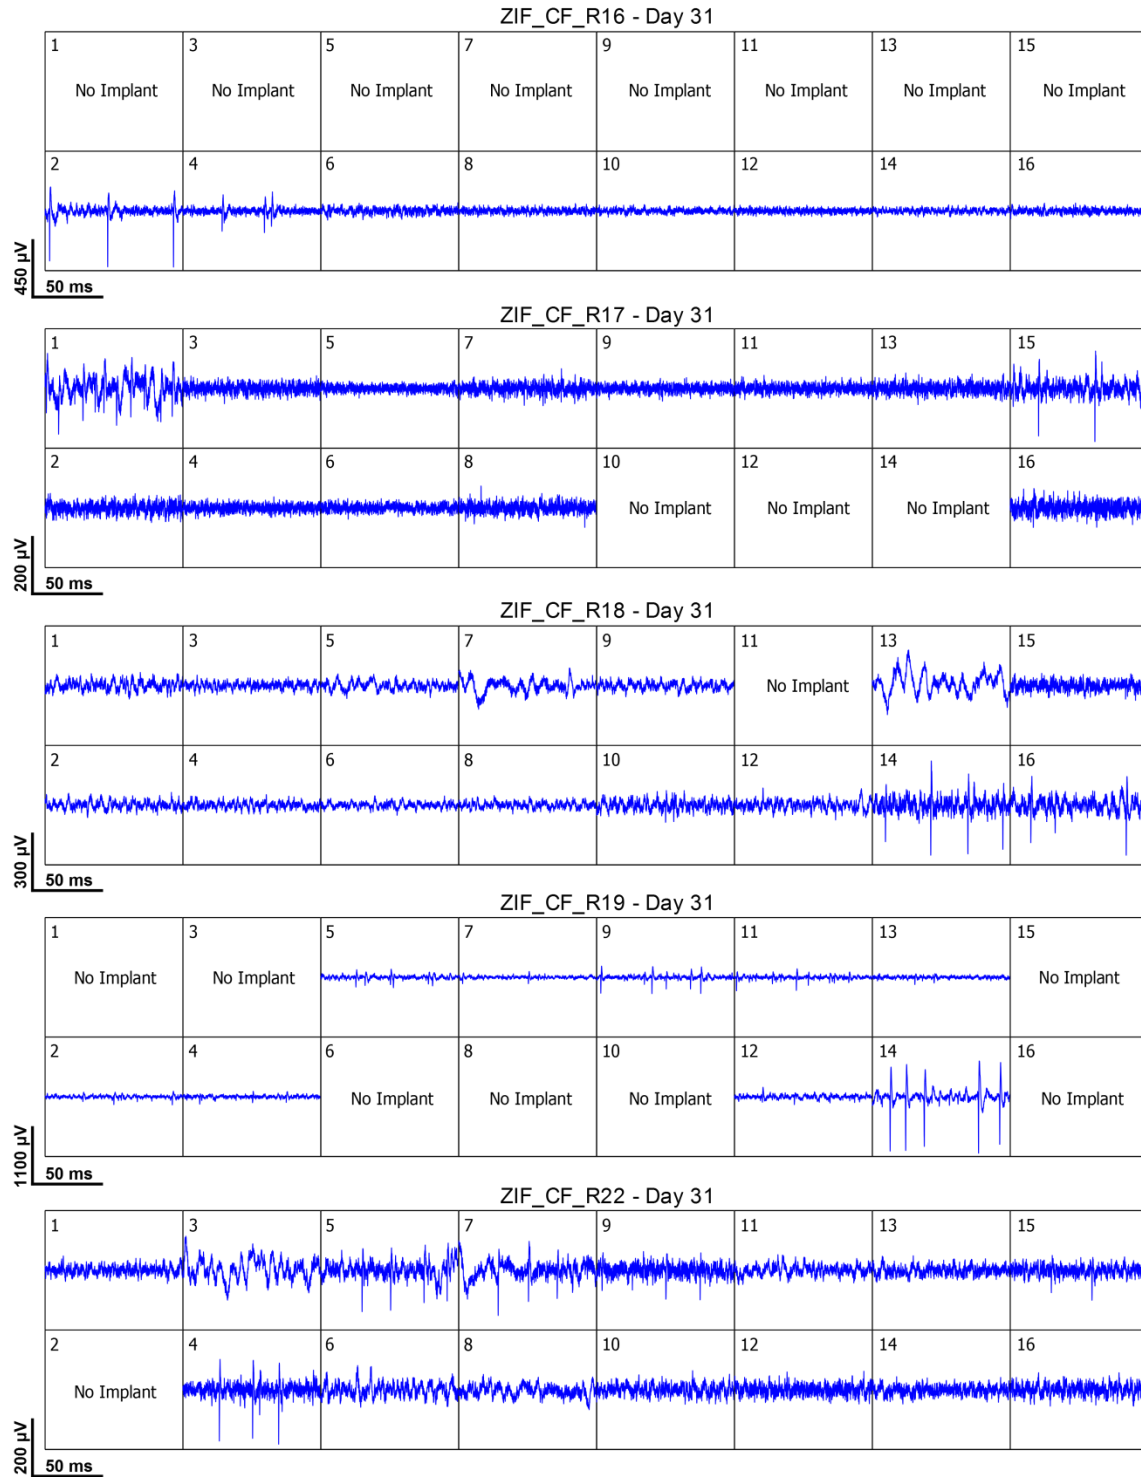

**Figure S3.** Representative filtered (250 Hz corner, 4<sup>th</sup> order Butterworth, high-pass) high speed recordings from each implanted carbon fiber at day 31 post-operatively.

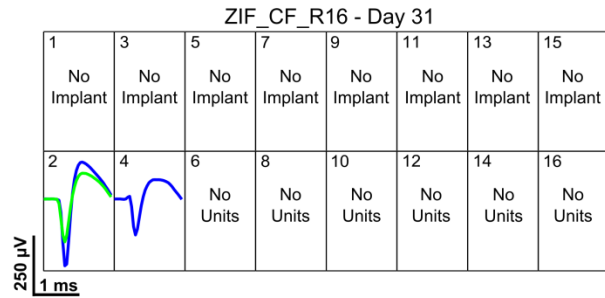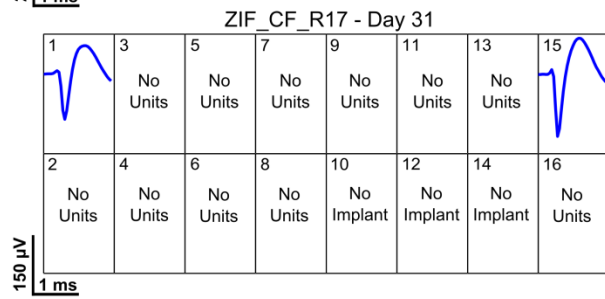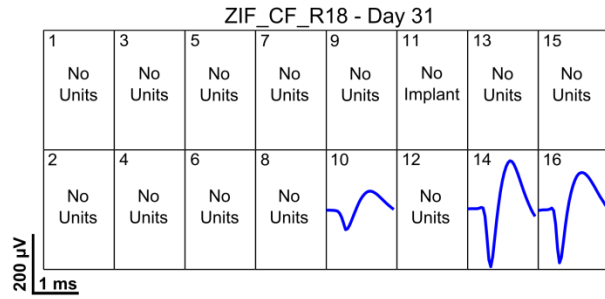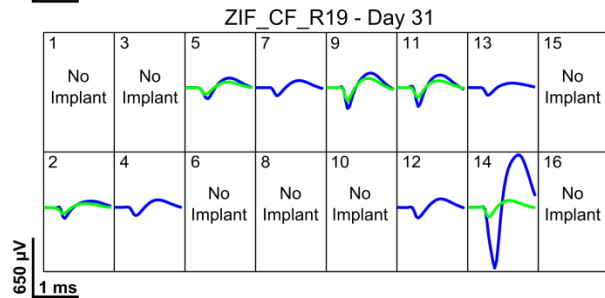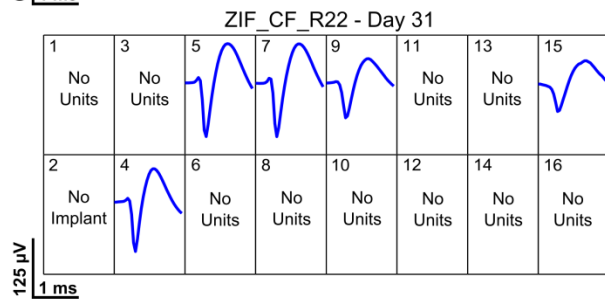

**Figure S4.** Average waveforms of sorted units detected on each implanted site at day 31 post-operatively.
